# Supplementary material
Source: PubMed Central journal article supplement (PMC3957647)
Supplement: AEM.04150-13_zam999105212so1.pdf [file AEM.04150-13_zam999105212so1.pdf]

## Supplementary materials

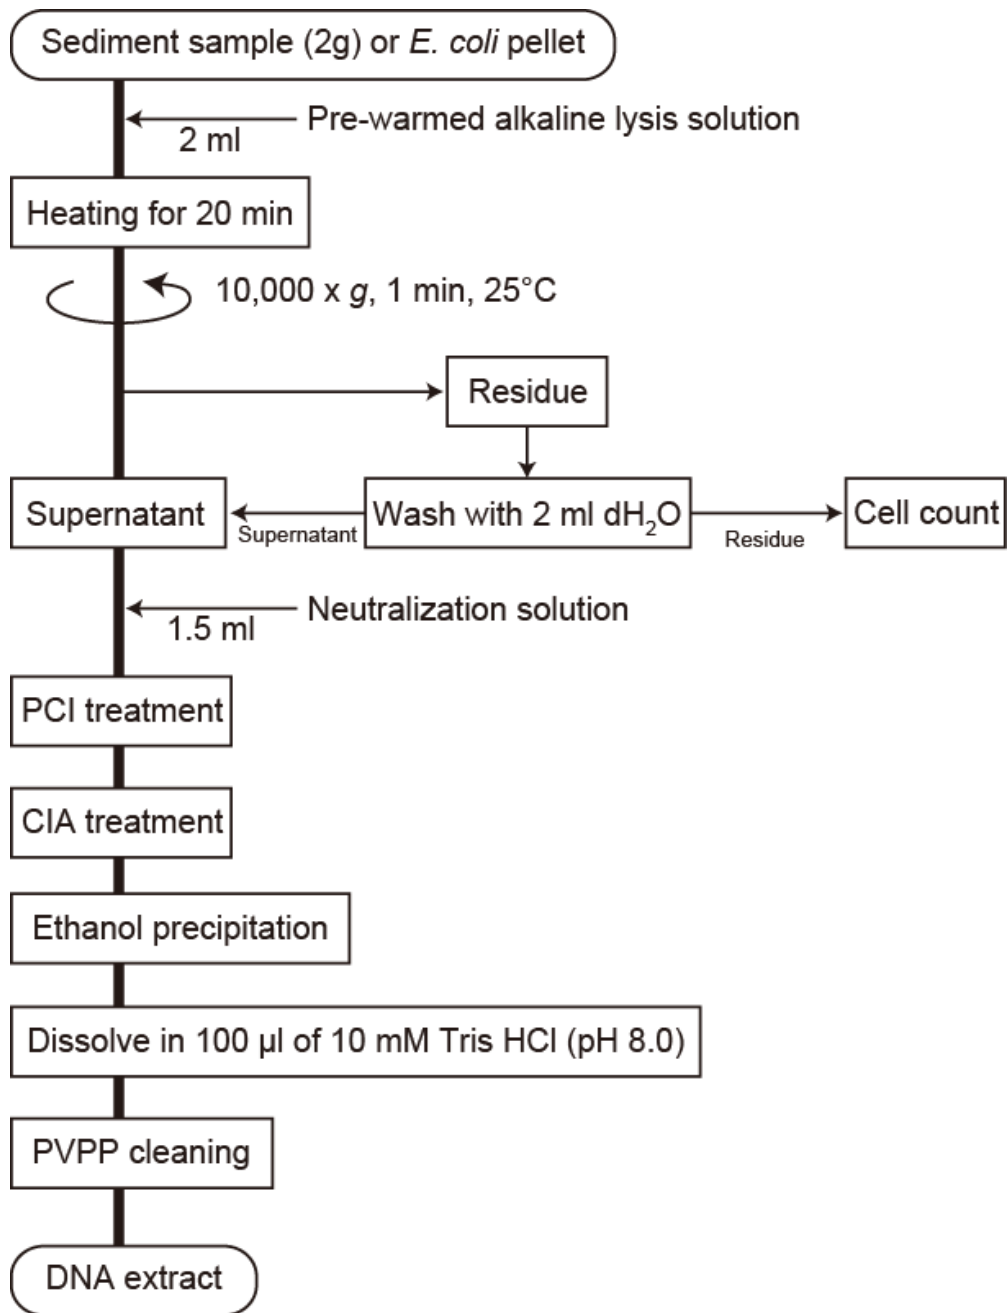

Supplementary Figure 1. Summarized scheme for hot alkaline DNA extraction

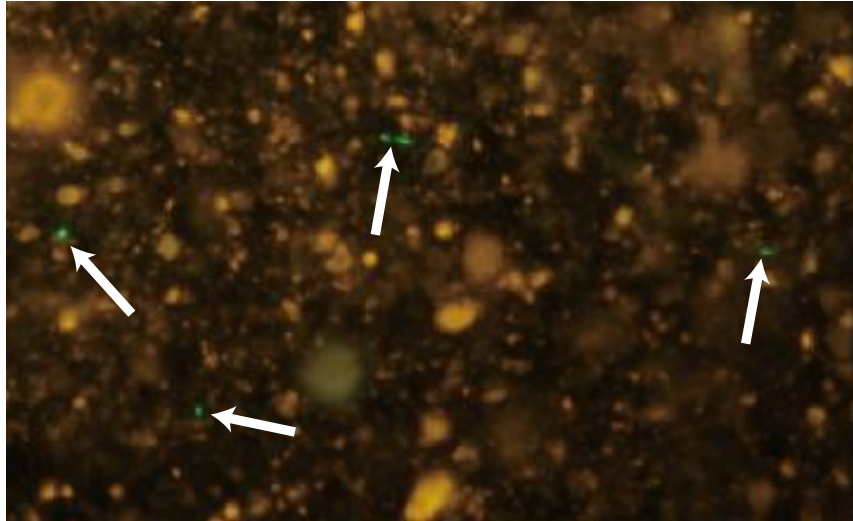

**Supplementary Figure 2. Microbial cells found in residue of sediment sample of 2H-2 after DNA extraction with a commercial kit. Microbial cells are indicated by white arrows.**

**A**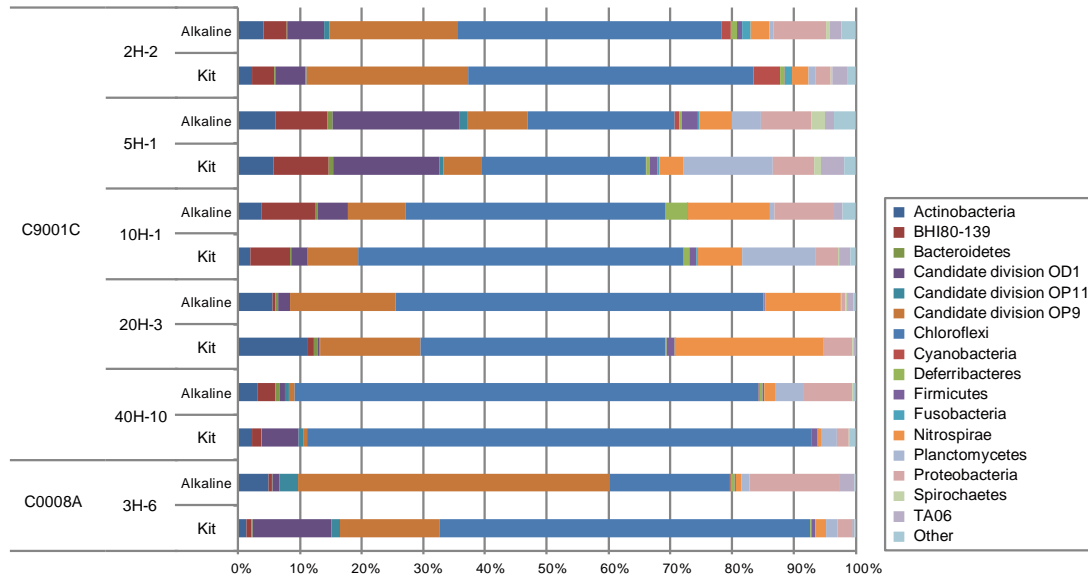**B**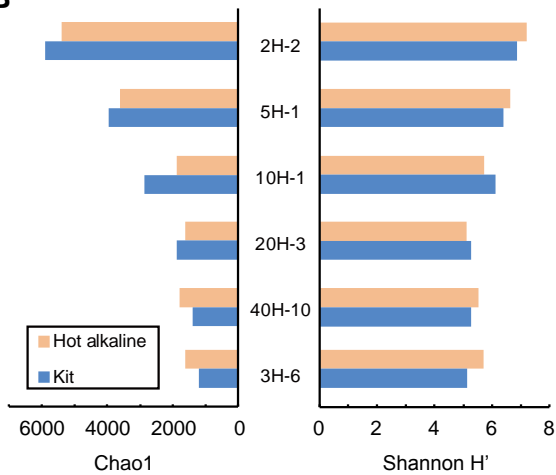**C**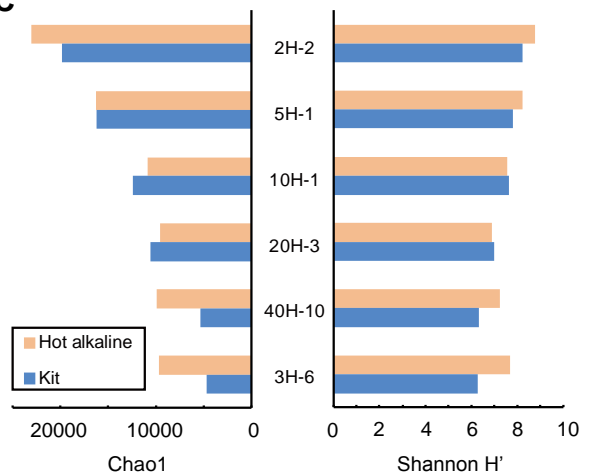

### Supplementary Fig. 3. Characterization of extracted bacterial DNA

(A) Phylogenetic composition of bacterial 16S rRNA genes as determined by pyrosequencing of extracted DNAs.

(B) Bacterial diversity estimated by Chao 1 species richness and Shannon-Wiener ( $H'$ ) indices calculated using

pyrosequence data with a similarity cut-off of 97%, and (C) 99%.

**Supplementary Table 1. Effect of extracellular DNA washing procedure on microbial cell number.** To evaluate the potential effect of the extracellular DNA washing procedure on intact microbial cells, we determined the number of intact cells before and after washing and found that there was no significant difference in cell number even after washing for 1 h at room temperature.

| Microbial cell abundance (cells cm <sup>-3</sup> ) |                             |
|----------------------------------------------------|-----------------------------|
| Directly suspended                                 | $4.43 \pm 1.72 \times 10^7$ |
| ASW wash 1h                                        | $4.24 \pm 1.79 \times 10^7$ |

Supplementary Table 2. Summary of pyrosequence data

| Expedition                         | Drilling site                                       | Core   | Depth (mbsf) | DNA extraction method | Number of sequence reads for bacteria | Chao 1 estimates |       | Shannon index |      |
|------------------------------------|-----------------------------------------------------|--------|--------------|-----------------------|---------------------------------------|------------------|-------|---------------|------|
|                                    |                                                     |        |              |                       |                                       | 97%              | 99%   | 97%           | 99%  |
| Chikyu shakedown cruise<br>CK06-06 | 2H-2                                                |        | 9.5          | kit                   | 17051                                 | 5900             | 19805 | 6.87          | 8.21 |
|                                    |                                                     |        |              | hot-alkaline          | 20899                                 | 5390             | 23036 | 7.19          | 8.78 |
|                                    | 5H-1                                                |        | 35.4         | kit                   | 10368                                 | 861              | 4353  | 4.97          | 6.90 |
|                                    |                                                     |        |              | hot-alkaline          | 10345                                 | 1112             | 11063 | 5.79          | 8.03 |
|                                    | 10H-1                                               | C9001C | 84.0         | kit                   | 16359                                 | 3951             | 16200 | 6.39          | 7.81 |
|                                    |                                                     |        |              | hot-alkaline          | 18223                                 | 3608             | 16289 | 6.62          | 8.23 |
|                                    | 20H-3                                               |        | 177.4        | kit                   | 14171                                 | 703              | 4114  | 5.10          | 6.95 |
|                                    |                                                     |        |              | hot-alkaline          | 8728                                  | 819              | 8224  | 5.48          | 7.65 |
|                                    | 40H-10                                              | C0008A | 364.0        | kit                   | 15126                                 | 2860             | 12403 | 6.11          | 7.62 |
|                                    |                                                     |        |              | hot-alkaline          | 16904                                 | 1889             | 10867 | 5.72          | 7.55 |
| 3H-6                               | Integrated Ocean Drilling<br>Program Expedition 316 | 22.0   | kit          | 12724                 | 280                                   | 2286             | 3.89  | 5.80          |      |
|                                    |                                                     |        | hot-alkaline | 11215                 | 187                                   | 3507             | 3.16  | 5.96          |      |
|                                    |                                                     |        | kit          | 18587                 | 1883                                  | 10580            | 5.27  | 6.99          |      |
|                                    |                                                     |        | hot-alkaline | 21086                 | 1624                                  | 9592             | 5.12  | 6.89          |      |
|                                    |                                                     |        | kit          | 10439                 | 225                                   | 1458             | 3.40  | 5.21          |      |
|                                    |                                                     |        | hot-alkaline | 8789                  | 535                                   | 4552             | 4.10  | 6.59          |      |
|                                    |                                                     |        | kit          | 29414                 | 1401                                  | 5309             | 5.28  | 6.31          |      |
|                                    |                                                     |        | hot-alkaline | 19750                 | 1795                                  | 9895             | 5.52  | 7.25          |      |
|                                    |                                                     |        | kit          | 16350                 | 168                                   | 1331             | 3.32  | 4.78          |      |
|                                    |                                                     |        | hot-alkaline | 6997                  | 417                                   | 4284             | 4.23  | 6.79          |      |
|                                    |                                                     |        | kit          | 27270                 | 1209                                  | 4677             | 5.14  | 6.27          |      |
|                                    |                                                     |        | hot-alkaline | 15985                 | 1625                                  | 9702             | 5.70  | 7.67          |      |
|                                    |                                                     |        | kit          | 13919                 | 187                                   | 1182             | 3.05  | 4.88          |      |
|                                    |                                                     |        | hot-alkaline | 11731                 | 259                                   | 4029             | 3.85  | 6.55          |      |
